# Supplementary material for: Rapid dose rate estimation for trapped charge dating using pXRF measurements of potassium concentration
Source: Copernicus journal article supplement (doi:10.5194/gchron-8-1-2026), 2026-01-07
Supplement: Supplementary file [file gchron-8-1-2026-supplement-title-page.pdf › gchron-8-1-2026-supplement-title-page.pdf]

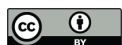

## *Supplement of*

# **Rapid dose rate estimation for trapped charge dating using pXRF measurements of potassium concentration**

**Sam Woor et al.**

*Correspondence to:* Sam Woor ([samuel.woor@ufv.ca](mailto:samuel.woor@ufv.ca))

- [gchron-8-1-2026-supplement-title-page.pdf](#)
- [Supp 1 training data\\_v2.csv](#)
- [Supp 2 High precision dose rate info.csv](#)
- [Supp 3 Rapid dose rate info\\_v2.csv](#)
- [pXRF\\_DR\\_supplementary\\_V3.pdf](#)

The copyright of individual parts of the supplement might differ from the article licence.
